# Supplementary material for: Fundamental, technical and environmental overviews of plastic chemical recycling
Source: Royal Society of Chemistry journal article supplement (doi:10.1039/d4gc03127j), 2024-01-01
Supplement: d4gc03127j1.pdf [file d4gc03127j1.pdf]

Table S 1: Previous work on Environmental and Economic assessments of plastic waste chemical recycling

| S/No | Plastic waste type                                         | Recycling technology          | LCA/TEA | Functional unit   | System boundary | Method       | GWP (reported)                  | Normalised GWP (kgCO <sub>2</sub> -eq/kg MPW) | Cost (\$) | Ref |
|------|------------------------------------------------------------|-------------------------------|---------|-------------------|-----------------|--------------|---------------------------------|-----------------------------------------------|-----------|-----|
| 1    | PE, PVC, PP,PS,PET, others (MPW1)                          | Gasification supported by MR* | LCA     | 822,200 t MPW     | cradle-to-gate  | Recipe       | 370 kgCO <sub>2</sub> -eq/t MPW | 0.37                                          |           | [1] |
|      |                                                            | Pyrolysis                     |         |                   |                 | Recipe       | 650 kgCO <sub>2</sub> -eq/t MPW | 0.65                                          |           |     |
| 2    | Mixed plastics (PET, PP, PE (including films), PVC) (MPW2) | Gasification                  | LCA     | 1 t               | cradle-to-gate  | IPCC, (2006) | 400 kgCO <sub>2</sub> -eq/t     | 0.4                                           |           | [2] |
|      | Mixed plastics (HDPE, LDPE, PP) (MPW3)                     | Gasification                  | LCA     | 1 t               | cradle-to-gate  | GHG          | 880 kgCO <sub>2</sub> -eq/t     | 0.88                                          |           | [3] |
| 3    | PE                                                         | Pyrolysis                     | LCA     | 1 t of bank notes | gate-to-grave   | CML, USEtox  | 870 kgCO <sub>2</sub> -eq/t     | 0.87                                          |           | [4] |
| 4    | MP(PE,PP,PS,PVC, others) (MPW4)                            | Pyrolysis                     | LCA     | 1 kg              | cradle-to-gate  | GHG          | 490 kgCO <sub>2</sub> -eq/t     | 0.49                                          |           | [5] |
| 5    | HDPE, LDPE, PP, PET, PVC, PS(MPW5)                         | Pyrolysis                     | LCA     | 1 kg              | cradle-to-gate  | GHG          | 600 kgCO <sub>2</sub> -eq/t     | 0.6                                           |           | [6] |

| S/No | Plastic waste type | Recycling technology | LCA/TEA | Functional unit | System boundary | Method   | GWP (reported)                                                                                                              | Normalised GWP (kgCO <sub>2</sub> -eq/kg MPW) | Cost (\$)                     | Ref |
|------|--------------------|----------------------|---------|-----------------|-----------------|----------|-----------------------------------------------------------------------------------------------------------------------------|-----------------------------------------------|-------------------------------|-----|
| 6    | PET (trays)        | Pyrolysis*           | LCA     | 1 t PET         | cradle-to-gate  | CML 2001 | GWP = 305330 kgCO <sub>2</sub> -eq; AP= -10.36 kgSO <sub>2</sub> -eq; ADP = 43.15 kgSB-eq; EuP = 2.93 kgNO <sub>x</sub> -eq | 3.053                                         |                               | [7] |
|      |                    |                      |         |                 |                 |          | 80% Monomer recovery 2019 kgCO <sub>2</sub> -eq                                                                             | 2.019                                         |                               |     |
|      |                    |                      |         |                 |                 |          | 50% Monomer recovery 468 kgCO <sub>2</sub> -eq                                                                              | 0.468                                         |                               |     |
|      |                    |                      |         |                 |                 |          | w/O EG recovery =1660 kgCO <sub>2</sub> -eq                                                                                 | 1.66                                          |                               |     |
| 7    | HDPE               | Fast pyrolysis       | LCA/TEA | 1 t HDPE        | cradle-to-gate  | GHG      | CLCA = 3.66 tonCO <sub>2</sub> -eq/ton waste HDPE                                                                           | 3.66                                          | NPV of \$220.3/ton waste HDPE | [8] |
|      | HDPE               |                      |         |                 |                 |          | ALCA = 4.22 tonCO <sub>2</sub> -eq/ton waste HDPE                                                                           | 4.22                                          |                               |     |

| S/No | Plastic waste type                     | Recycling technology               | LCA/TEA | Functional unit | System boundary | Method            | GWP (reported)                                                           | Normalised GWP (kgCO <sub>2</sub> -eq/kg MPW) | Cost (\$) | Ref  |
|------|----------------------------------------|------------------------------------|---------|-----------------|-----------------|-------------------|--------------------------------------------------------------------------|-----------------------------------------------|-----------|------|
| 8    | PET/PE                                 | Low Temp. Pyrolysis                | LCA     | 1kg PET flakes  | cradle-to-gate  | -                 | LTP + MR = 1.7kgCO <sub>2</sub> -eq;                                     | 1.7                                           |           | [9]  |
|      |                                        | Hydrocracking                      |         |                 |                 |                   | HC+MR = 2.02 kgCO <sub>2</sub> -eq                                       | 2.02                                          |           |      |
| 9    | PLA (PCPW)                             | Solvent based & Chemical Recycling | LCA     | 1 t PLA waste   | cradle-to-gate  | PEF, Recipe, IPCC | Chem (PLA to dilactide) = 700 kg CO <sub>2</sub> -eq                     | 0.7                                           |           | [10] |
|      |                                        |                                    |         |                 |                 |                   | Solvent-based = 521 kgCO <sub>2</sub> -eq                                | 0.521                                         |           |      |
| 10   | MPW (PE, PP, PS,PU,PET) (MPW6)         | Pyrolysis-Gasification             | LCA     | 1 kg material   | gate-to-gate    | CML baseline      | GWP = 2.6 kgCO <sub>2</sub> -eq/kg; AP = 0.0006 kgSO <sub>2</sub> -eq/kg | 2.6                                           |           | [11] |
| 11   | PE(LDPE,HDPE),PP,PVC,PS & others(MPW7) | LTP & Hydrogenstion                | LCA     | 1000 tpa        | cradle-to-gate  | CML               | GWP: LTP1 = 1.2 kgCO <sub>2</sub> -eq                                    | 1.2                                           |           | [12] |
|      |                                        |                                    |         |                 | cradle-to-gate  | CML               | LTP0.5 = 3 kgCO <sub>2</sub> -eq                                         | 3                                             |           |      |
|      |                                        |                                    |         |                 | cradle-to-gate  | CML               | LTP0 = 4.0 kgCO <sub>2</sub> -eq                                         | 4                                             |           |      |
|      |                                        |                                    |         |                 | cradle-to-gate  | CML               | VCC1 = 5.0 kg CO <sub>2</sub> -eq                                        | 5                                             |           |      |

| S/No | Plastic waste type                             | Recycling technology       | LCA/TEA | Functional unit | System boundary | Method          | GWP (reported)                                                                                                                       | Normalised GWP (kgCO <sub>2</sub> -eq/kg MPW) | Cost (\$) | Ref  |
|------|------------------------------------------------|----------------------------|---------|-----------------|-----------------|-----------------|--------------------------------------------------------------------------------------------------------------------------------------|-----------------------------------------------|-----------|------|
|      |                                                |                            |         |                 | cradle-to-gate  | CML             | VCC0.5 = 7 kgCO <sub>2</sub> -eq                                                                                                     | 7                                             |           |      |
|      |                                                |                            |         |                 | cradle-to-gate  | CML             | VCC0= 12 kg CO <sub>2</sub> -eq                                                                                                      | 12                                            |           |      |
| 12   | Hard plastics(PP,PE, PS,PET,PVC, others(MPW1)) | FR(via pyrolysis)          | LCA-TEA | 1 t             | gate-to-gate    | IPCC; EASETEC H | 374 kg CO <sub>2</sub> eq/FU                                                                                                         | 0.374                                         | 16 €/FU   | [13] |
| 13   | PET                                            | Back-to-oligomer &         | LCA     | 1 t             | cradle-to-gate  | CML 2 baseline  | GWP: Chemical, BHET=2.59 tCO <sub>2</sub> -eq; [BHET= POCP = 0.6 kg C <sub>2</sub> H <sub>4</sub> - eq; AP=14 kgSO <sub>2</sub> -eq] | 2.59                                          |           | [14] |
|      |                                                | Back-to-monomer            | LCA     |                 | cradle-to-gate  |                 | GWP: Chemical, DMT=3.08 tCO <sub>2</sub> -eq                                                                                         | 3.08                                          |           |      |
|      |                                                | Virgin plastic (PET fibre) | LCA     |                 | cradle-to-gate  |                 | 4.06 tCO <sub>2</sub> -eq                                                                                                            | 4.06                                          |           |      |
| 14   | MPW1                                           | Mechanical Recycling       | LCA     | 822,200 t MPW   | cradle-to-gate  | Recipe          | 400 kgCO <sub>2</sub> -eq                                                                                                            | 0.4                                           |           | [1]  |
| 15   | MPW5                                           | Mechanical Recycling       | LCA     | 1 kg            | cradle-to-gate  | CML 2001        | 400 kgCO <sub>2</sub> -eq                                                                                                            | 0.4                                           |           | [6]  |
| 16   | Polyolefins - PP,PE (MPW9)                     | Virgin plastic production  | LCA     | 1 kg            | cradle-to-gate  | CML             | 2.5 kgCO <sub>2</sub> -eq                                                                                                            | 2.5                                           |           | [15] |

| S/No | Plastic waste type             | Recycling technology      | LCA/TEA | Functional unit | System boundary | Method | GWP (reported)            | Normalised GWP (kgCO <sub>2</sub> -eq/kg MPW) | Cost (\$) | Ref  |
|------|--------------------------------|---------------------------|---------|-----------------|-----------------|--------|---------------------------|-----------------------------------------------|-----------|------|
| 17   | Polyolefins - PP,PE,PET (MPW9) | Virgin plastic production | LCA     | 28kg            | cradle-to-gate  | CML 2  | 130 kgCO <sub>2</sub> -eq | 4.6                                           |           | [16] |

MR=Mechanical recycling; BHET= bis-hydroxyethylene terephthalate; DMT:

### References

- [1] H. H. Khoo, "LCA of plastic waste recovery into recycled materials, energy and fuels in Singapore," *Resour Conserv Recycl*, vol. 145, pp. 67–77, Jun. 2019, doi: 10.1016/j.resconrec.2019.02.010.
- [2] R. Cossu, F. Garbo, F. Girotto, F. Simion, and A. Pivato, "PLASMIX management: LCA of six possible scenarios," 2017, doi: 10.1016/j.wasman.2017.08.007.
- [3] M. Morandin, S. Heyne, H. Jilvero, M. Gyllenhammar, L. Pettersson, and S. Harvey, "Thermochemical recycling of plastics for production of chemical intermediates at a Swedish chemical complex site".
- [4] "LCA of Management Options for Polymer Waste from Bank Notes Final Study Report".
- [5] X. Chen, F. Xi, Y. Geng, and T. Fujita, "The potential environmental gains from recycling waste plastics: Simulation of transferring recycling and recovery technologies to Shenyang, China," 2010, doi: 10.1016/j.wasman.2010.08.010.
- [6] "Shonfield: LCA of management options for mixed waste... - Google Scholar." Accessed: May 02, 2024. [Online]. Available: [https://scholar.google.com/scholar\\_lookup?title=LCA%20of%20Management%20Options%20for%20Mixed%20Waste%20Plastics.%20Final%20Report&publication\\_year=2008&author=WRAP](https://scholar.google.com/scholar_lookup?title=LCA%20of%20Management%20Options%20for%20Mixed%20Waste%20Plastics.%20Final%20Report&publication_year=2008&author=WRAP)
- [7] J. Rickert, F. Cerdas, and C. Herrmann, "Exploring the environmental performance of emerging (chemical) recycling technologies for post-consumer plastic waste," *Procedia CIRP*, vol. 90, pp. 426–431, 2020, doi: 10.1016/j.procir.2020.01.111.
- [8] X. Zhao and F. You, "Consequential Life Cycle Assessment and Optimization of High-Density Polyethylene Plastic Waste Chemical Recycling," *ACS Sustain Chem Eng*, vol. 9, no. 36, pp. 12167–12184, Sep. 2021, doi: 10.1021/ACSSUSCHEMENG.1C03587/SUPPL\_FILE/SC1C03587\_SI\_001.PDF.

- [9] F. Perugini, M. L. Mastellone, and U. Arena, "A life cycle assessment of mechanical and feedstock recycling options for management of plastic packaging wastes," *Environmental Progress*, vol. 24, no. 2, pp. 137–154, Jul. 2005, doi: 10.1002/EP.10078.
- [10] D. Maga, M. Hiebel, and N. Thonemann, "Life cycle assessment of recycling options for polylactic acid," 2019, doi: 10.1016/j.resconrec.2019.05.018.
- [11] A. Demetrious and E. Crossin, "Life cycle assessment of paper and plastic packaging waste in landfill, incineration, and gasification-pyrolysis," *J Mater Cycles Waste Manag*, vol. 21, no. 4, pp. 850–860, Jul. 2019, doi: 10.1007/s10163-019-00842-4.
- [12] S. M. Al-Salem, S. Evangelisti, and P. Lettieri, "Life cycle assessment of alternative technologies for municipal solid waste and plastic solid waste management in the Greater London area", doi: 10.1016/j.cej.2014.01.066.
- [13] G. Faraca, V. Martinez-Sanchez, and T. F. Astrup, "Environmental life cycle cost assessment: Recycling of hard plastic waste collected at Danish recycling centres," 2019, doi: 10.1016/j.resconrec.2019.01.014.
- [14] L. Shen, E. Worrell, and M. K. Patel, "Open-loop recycling: A LCA case study of PET bottle-to-fibre recycling," vol. 55, pp. 34–52, 2010, doi: 10.1016/j.resconrec.2010.06.014.
- [15] K. G. Harding, J. S. Dennis, H. von Blottnitz, and S. T. L. Harrison, "Environmental analysis of plastic production processes: Comparing petroleum-based polypropylene and polyethylene with biologically-based poly- $\beta$ -hydroxybutyric acid using life cycle analysis," *J Biotechnol*, vol. 130, no. 1, pp. 57–66, May 2007, doi: 10.1016/j.jbiotec.2007.02.012.
- [16] V. Mannheim, "Life cycle assessment model of plastic products: Comparing environmental impacts for different scenarios in the production stage," *Polymers (Basel)*, vol. 13, no. 5, pp. 1–20, Mar. 2021, doi: 10.3390/polym13050777.
